# Supplementary material for: Deodorant pad for ulcerated breast cancer: safety and efficacy
Source: PubMed Central journal article supplement — BMJ Support Palliat Care. 2024 Jul 2;14(e2):e005024. doi: 10.1136/spcare-2024-005024 (PMC11671911; doi:10.1136/spcare-2024-005024), 2024-07-02
Supplement: spcare-14-e2-s001.pdf [file spcare-14-e2-s001.pdf]

Supplementary Table 1 Clinical characteristics of the patients

| Age (years)                   |                 | Median  | range   |
|-------------------------------|-----------------|---------|---------|
|                               |                 | 67      | (37-71) |
|                               |                 | n(N=14) | (%)     |
| Sex                           | Female          | 13      | 92.9%   |
|                               | Male            | 1       | 7.1%    |
| Cancer subtypes*              | Luminal         | 11      | 78.6%   |
|                               | HER2-enriched   | 2       | 14.3%   |
|                               | TNBC            | 1       | 7.1%    |
| The site of effusion and odor | Primary         | 10      | 71.4%   |
|                               | Skin metastasis | 4       | 28.6%   |
| Treatment                     |                 |         |         |
| Surgery                       | Done            | 4       | 28.6%   |
|                               | None            | 10      | 71.4%   |
| Radiation                     | Done            | 2       | 14.3%   |
|                               | None            | 12      | 85.7%   |

\*Luminal: ER positive and/or PgR negative and HER2 negative breast cancer; HER2-enriched HER2positive; TNBC: triple negative breast cancer
