# Supplementary material for: Deodorant pad for ulcerated breast cancer: safety and efficacy
Source: PubMed Central journal article supplement — BMJ Support Palliat Care. 2024 Jul 2;14(e2):e005024. doi: 10.1136/spcare-2024-005024 (PMC11671911; doi:10.1136/spcare-2024-005024), 2024-07-02
Supplement: spcare-14-e2-s002.pdf [file spcare-14-e2-s002.pdf]

Supplementary Table 2 : The results of the patient questionnaire how to care their ulcera

N=14

|                                             |                      | Number |
|---------------------------------------------|----------------------|--------|
| The frequency of pad replacement            | once a day           | 7      |
|                                             | twice a day          | 7      |
| The material to treat the ulcerating cancer | gauze                | 8      |
|                                             | wound pads           | 3      |
|                                             | urinary pads         | 1      |
|                                             | sanitary napkins     | 1      |
| The ointment (multiple answers allowed)     | Hakujji Moiskin pad® | 1      |
|                                             | Vaseline             | 7      |
|                                             | Lozex®               | 5      |
|                                             | Mors Ointment        | 1      |
|                                             | none                 | 4      |

ting cancer

---

4

---

(%)

---

|       |
|-------|
| 50.0% |
| 50.0% |
| 57.1% |
| 21.4% |
| 7.1%  |
| 7.1%  |
| 7.1%  |
| 50.0% |
| 35.7% |
| 7.1%  |
| 28.6% |

---
